# Supplementary material
Source: MDPI journal article supplement (https://www.mdpi.com/2673-9410/3/1/5)
Supplement: s1 [file s1]

**Supplementary information for:**

**Germination of *Pyrodinium bahamense* cysts from a pristine lagoon in San José Island, Gulf of California: implications of long-term survival**

**Tomasa Cuellar-Martinez <sup>1</sup>, Lourdes Morquecho <sup>2</sup>, Rosalba Alonso-Rodriguez <sup>3,\*</sup>, Ana Carolina Ruiz-Fernández <sup>3</sup> and Joan-Albert Sanchez-Cabeza <sup>3</sup>**

<sup>1</sup> Instituto del Mar del Perú, Esquina Gamarra y General Valle S/N Chucuito, Callao 070101, Peru

<sup>2</sup> Centro de Investigaciones Biológicas del Noroeste (CIBNOR), Av. I.P.N. 195, Col. Playa Palo de Santa Rita Sur, La Paz 23096, Baja California Sur, Mexico

<sup>3</sup> Unidad Académica Mazatlán, Instituto de Ciencias del Mar y Limnología, Universidad Nacional Autónoma de México, Mazatlán 82040, Sinaloa, Mexico

\* Correspondence: rosalba@ola.icmyl.unam.mx

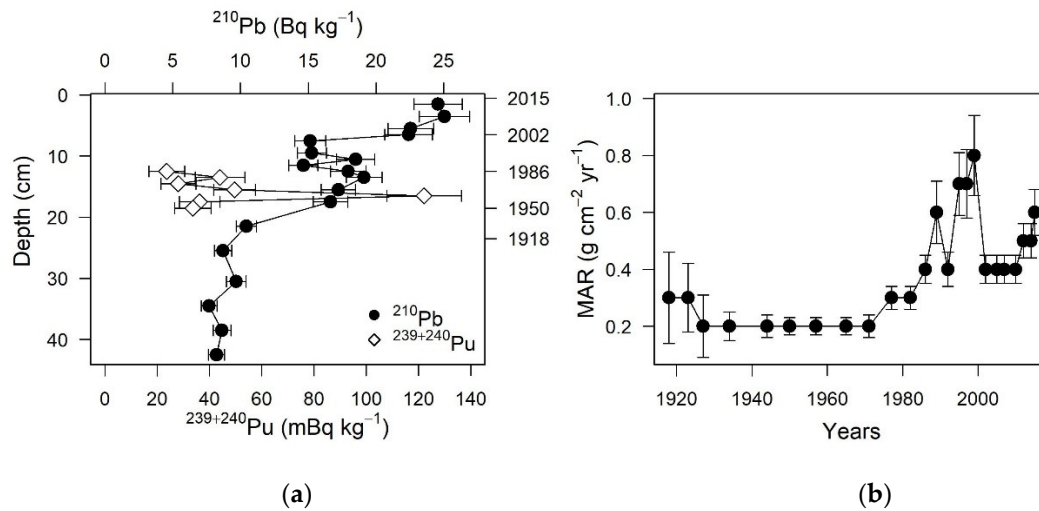

**Figure S1.**  $^{210}\text{Pb}$ -derived chronology of the San José core (San José Island, SW Gulf of California): a) depth profiles of  $^{210}\text{Pb}$  and  $^{239+240}\text{Pu}$  activities, and b) mass accumulation rates (MAR). Modified from Cuellar-Martinez et al. [58].

**Table S1.** Germination rate of *Pyrodinium bahamense* cysts isolated from San José Lagoon SW Gulf of California surface sediments.

| Culture medium   | Replicate no. | Incubation days | Germination rate | Light/Dark incubation |
|------------------|---------------|-----------------|------------------|-----------------------|
| Natural seawater | 1             | 10              | 21.3             | Light                 |
| Natural seawater | 2             | 10              | 15.6             | Light                 |
| Natural seawater | 3             | 10              | 25.0             | Light                 |
| Natural seawater | 4             | 10              | 49.4             | Light                 |
| Natural seawater | 5             | 10              | 27.8             | Light                 |
| Natural seawater | 6             | 20              | 32.5             | Light                 |
| Natural seawater | 7             | 20              | 36.3             | Light                 |
| Natural seawater | 8             | 20              | 40.0             | Light                 |

| <b>Culture medium</b> | <b>Replicate<br/>no.</b> | <b>Incubation days</b> | <b>Germination rate</b> | <b>Light/Dark<br/>incubation</b> |
|-----------------------|--------------------------|------------------------|-------------------------|----------------------------------|
| Natural seawater      | 9                        | 20                     | 71.9                    | Light                            |
| Natural seawater      | 10                       | 20                     | 45.2                    | Light                            |
| f/2 medium            | 1                        | 10                     | 32.0                    | Light                            |
| f/2 medium            | 2                        | 10                     | 17.0                    | Light                            |
| f/2 medium            | 3                        | 10                     | 60.0                    | Light                            |
| f/2 medium            | 4                        | 10                     | 60.0                    | Light                            |
| f/2 medium            | 5                        | 10                     | 42.3                    | Light                            |
| f/2 medium            | 6                        | 20                     | 60.6                    | Light                            |
| f/2 medium            | 7                        | 20                     | 62.5                    | Light                            |
| f/2 medium            | 8                        | 20                     | 63.0                    | Light                            |
| f/2 medium            | 9                        | 20                     | 40.0                    | Light                            |
| f/2 medium            | 10                       | 20                     | 56.0                    | Light                            |
| Natural seawater      | 1                        | 20                     | 10.0                    | Dark                             |
| Natural seawater      | 2                        | 20                     | 0.0                     | Dark                             |
| Natural seawater      | 3                        | 20                     | 40.0                    | Dark                             |
| Natural seawater      | 4                        | 20                     | 43.8                    | Dark                             |
| Natural seawater      | 5                        | 20                     | 23.4                    | Dark                             |
| f/2 medium            | 1                        | 20                     | 51.2                    | Dark                             |
| f/2 medium            | 2                        | 20                     | 43.7                    | Dark                             |
| f/2 medium            | 3                        | 20                     | 6.2                     | Dark                             |
| f/2 medium            | 4                        | 20                     | 33.7                    | Dark                             |
| f/2 medium            | 5                        | 20                     | 33.7                    | Dark                             |

**Table S2.** Number of dinoflagellate cysts isolated (germinated) from selected sections of the San José core.

| Species*<br>(Biological and<br>palynological<br>names)                     | Section<br>(cm) |   | 1–2      | 4–5      | 7–8      | 10–<br>11 | 13–<br>14 | 16–<br>17 | 19–<br>20 | 22–<br>23 | 25–26                                     | Total      |
|----------------------------------------------------------------------------|-----------------|---|----------|----------|----------|-----------|-----------|-----------|-----------|-----------|-------------------------------------------|------------|
|                                                                            | Age<br>u**      | ± | 2014     | 2007     | 1999     | 1992      | 1982      | 1965      | 1944      | 1923      | Beyond<br><sup>210</sup> Pb-<br>dating*** |            |
|                                                                            |                 |   | ±<br>0.2 | ±<br>0.5 | ±<br>0.9 | ±<br>1.2  | ±<br>1.6  | ±<br>2.8  | ±<br>5.0  | ±<br>8.0  |                                           |            |
| <i>Alexandrium</i> spp.                                                    |                 |   | 1 (1)    | -        | -        | 1 (0)     | -         | 3 (2)     | -         | -         | -                                         | 5 (3)      |
| <i>Gonyaulax digitale</i> ( <i>Spiniferites bentorii</i> )                 |                 |   | 1 (0)    | -        | -        | -         | -         | -         | -         | -         | -                                         | 1 (0)      |
| <i>G. scrippsae</i><br>( <i>Spiniferites belerius</i> )                    |                 |   | 2 (1)    | -        | -        | 1 (0)     | -         | -         | -         | -         | -                                         | 2 (1)      |
| <i>G. spinifera</i><br>( <i>Spiniferites mirabilis</i> )                   |                 |   | -        | -        | -        | 1 (0)     | -         | -         | -         | -         | -                                         | 1 (0)      |
| <i>G. spinifera</i> ( <i>Tectatodinium pellitum</i> )                      |                 |   | 1 (0)    | 1 (0)    | -        | 1 (0)     | -         | 1 (1)     | 1 (0)     | 1 (1)     | 6 (3)                                     | 12<br>(5)  |
| <i>G. spinifera</i> complex<br>( <i>Spiniferites hyperacanthus</i> )       |                 |   | -        | -        | -        | -         | -         | 1 (1)     | -         | -         | -                                         | 1 (1)      |
| <i>G. spinifera</i> complex<br>( <i>Spiniferites</i> spp.)                 |                 |   | -        | -        | -        | 4 (3)     | -         | -         | -         | 1 (1)     | -                                         | 5 (4)      |
| <i>Lingulodinium polyedra</i><br>( <i>Lingulodinium machaerophorum</i> )   |                 |   | -        | -        | -        | 2 (1)     | -         | -         | -         | -         | -                                         | 2 (1)      |
| Not identified 1                                                           |                 |   | 1 (1)    | -        | -        | -         | -         | -         | -         | -         | -                                         | 1 (1)      |
| Not identified 2                                                           |                 |   | -        | 1 (0)    | -        | -         | -         | -         | -         | -         | -                                         | 1 (0)      |
| <i>Protoceratium reticulatum</i><br>( <i>Operculodinium centrocarpum</i> ) |                 |   | -        | -        | -        | -         | 1 (1)     | -         | -         | -         | -                                         | 1 (1)      |
| <i>Protoperidinium</i> spp.<br>( <i>Brigantedinium</i> spp.)               |                 |   | 1 (0)    | -        | -        | -         | 1 (0)     | -         | -         | -         | 2 (0)                                     | 4 (0)      |
| <i>Pyrodinium bahamense</i><br>( <i>Polysphaeridium zoharyi</i> )          |                 |   | 7 (3)    | 8 (2)    | 5 (2)    | 6 (4)     | 4 (1)     | 7 (1)     | 6 (2)     | -         | 5 (4)                                     | 48<br>(19) |
| <i>Pyrophacus steinii</i><br>( <i>Tuberculodinium vacampoe</i> )           |                 |   | 1 (1)    | -        | -        | 1 (0)     | -         | -         | -         | -         | -                                         | 2 (1)      |
| <i>Scrippsiella</i> spp.                                                   |                 |   | -        | -        | -        | 3 (1)     | -         | 2 (1)     | 2 (1)     | -         | -                                         | 7 (3)      |

\*Palynological names in parenthesis; \*\* Indicates age uncertainty, in years; \*\*\* Age beyond the <sup>210</sup>Pb-chronology (> 1918 ± 9.0 yr in the 23-24 cm section)

**Table S3.** Maximum age at which germination of dinoflagellate cysts occurred in sediments from <sup>210</sup>Pb-dated cores.

| Dinoflagellate species                                                                     | Core name     | Collection sites                 | Approximate age (years ± uncertainty) | References |
|--------------------------------------------------------------------------------------------|---------------|----------------------------------|---------------------------------------|------------|
| <i>Scrippsiella</i> spp. e                                                                 | KF2           | Koljö Fjord, Sweden              | 40±4                                  | [51]       |
| <i>Lingulodinium polyedra</i> (F.Stein) J.D.Dodge 1989                                     | and K4        |                                  | 80±12                                 |            |
| <i>Protoceratium reticulatum</i> (Claparède & Lachmann) Bütschli 1885                      |               |                                  |                                       |            |
| <i>Pentaphapsodinium dalei</i> Indelicato & A.R.Loeblich 1986                              | Not specified | Koljö Fjord, Sweden              | 87±12                                 | [52]       |
| <i>Alexandrium tamarense</i> (Lebour) Balech 1995                                          | Not specified | Funka Bay, Japan                 | 106±10                                | [53]       |
| <i>Protoperidinium</i> spp.                                                                | KF2           | Koljö Fjord, Sweden and          |                                       | [54]       |
| <i>Gonyaulax</i> spp.                                                                      |               | Mariager Fjord, Northern Denmark | 10±3 <sup>1</sup>                     |            |
| <i>Scrippsiella acuminata</i> Kretschmann, Zinssmeister, Kirsch, Kusber & Gottschling 2015 | K4            |                                  | 30±4 <sup>1</sup>                     |            |
|                                                                                            |               |                                  | 80±12 <sup>1</sup>                    |            |
|                                                                                            |               |                                  | 50 <sup>2</sup>                       |            |
| <i>Preperidinium meunieri</i> (Pavillard) Elbrächter 1993                                  | KF2           |                                  |                                       | [78]       |
| <i>Apocalathium malmogiense</i> (G.Sjöstedt) Craveiro, Daugbjerg, Moestrup & Calado 2016   | LL7           | Gulf of Finland, Baltic sea      | 105±8                                 |            |
| <i>Alexandrium minutum</i> Halim 1960 <sup>3</sup>                                         | KS03          | Bay of Brest Brittany, France    | 156±27                                |            |
| <i>Heterocapsa minima</i> A.J.Pomroy 1989 <sup>3</sup>                                     |               |                                  |                                       | [80]       |
| <i>Scrippsiella acuminata</i> <sup>3</sup>                                                 |               |                                  |                                       |            |
| <i>Pyrodinium bahamense</i> L.Plate 1906                                                   | San José core | San José Lagoon, Mexico          | >100 <sup>4</sup>                     | This study |

<sup>1</sup>Uncertainty was obtained from the dating presented by Lundholm et al. [51]; <sup>2</sup> Age uncertainty not available; <sup>3</sup> Germination with biostimulants; <sup>4</sup> Age beyond the <sup>210</sup>Pb-chronology (> 1918 ± 9.0 yr).
